# Supplementary material for: Regulating the Microcrystalline Structure of Anthracite via Thermal Treatment Strategies for Enhanced Sodium-Ion Storage Performance
Source: Research Square preprint supplement (doi:10.21203/rs.3.rs-7693425/v1), 2025-10-09
Supplement: Supplementary file 1 [file 98ad4cbc4bd04b8362fb2962.docx]

Supporting Information

Regulating the Microcrystalline Structure of Anthracite via Thermal Treatment Strategies for Enhanced Sodium Ion Storage Performance

*Yulong Zhanga, Deping Xiong a*, Yandong Xieb*, Qu Wanga, Zuyong Fenga*

AUTHOR ADDRESS

*aSchool of Physics and Optoelectronic Engineering, Guangdong University of Technology, Guangzhou 510006, China.*

*bSchool of Materials Engineering, Lanzhou Institute of Technology, Lanzhou 730050, China.*

*** Corresponding author.

E-mail address:[depingxiong@gdut.edu.cn](mailto:depingxiong@gdut.edu.cn).[yandongxie35@foxmail.com](mailto:yandongxie35@foxmail.com).

**Formula 1**

where, d denotes the interplanar spacing, represents the angle between the planes, m indicates the diffraction order, and signifies the wavelength of the X-rays.

**Table S1** Analysis results of pore size and volume by BJH method of ASC600-1400、ASC700-1400、ASC800-1400.

| Sample(name) | Vtot(cm3 g-1) | Dave(nm) | SBET(m2 g-1) | D10(nm) | D50(nm) | D90(nm) | D99(nm) |
| --- | --- | --- | --- | --- | --- | --- | --- |
| ASC600-1400 | 0.0331 | 7.3635 | 17.9762 | 3.0310 | 16.3927 | 96.0928 | 117.4859 |
| ASC700-1400 | 0.0274 | 8.6299 | 12.7001 | 3.3439 | 22.3226 | 98.1777 | 118.5173 |
| ASC800-1400 | 0.0260 | 8.3165 | 12.5052 | 3.4853 | 19.1212 | 97.4836 | 119.791 |

**Table S2** Contributions of corresponding oxygen-containing functional groups to the fitted O1S spectra of ASC700-1400.

| Sample | Contains oxygen  functional content  (peak area) | C=O (%) | C-O (%) |
| --- | --- | --- | --- |
| ASC700-1400 | 203347.51 | 96.41 | 87.3 |

**Table S3** Contributions of corresponding carbon -containing functional groups to the fitted C1S spectra of ASC700-1400.

| Sample | Contains carbon  functional content  (peak area) | C=O (%) | C-O (%) | C-C(%) |
| --- | --- | --- | --- | --- |
| ASC700-1400 | 332399.14 | 33.64 | 44.48 | 56.55 |





**Fig S1** ACS600-1400、ACS700-1400、ACS800-1400 Platform capacity share.





**Fig S2** ACS600-1400、ACS700-1400、ACS800-1400 Intercalation capacity ratio.





**Fig S3** Contribution percentages of diffusion-controlled and capacitive processes at different scan rates of ASC700-1400.





**Fig S4** CV curves displaying the capacitive contribution (yellow area) to the total current at 1 mV s−1 of ASC700-1400.





**Fig S5** GITT curves of the ASC600-1400 during the discharge/charge process.





**Fig S6** GITT curves of the ASC700-1400 during the discharge/charge process.





**Fig S7** GITT curves of the ASC800-1400 during the discharge/charge process.
